# Supplementary material for: SIRT3 and SIRT5 Regulate the Enzyme Activity and Cardiolipin Binding of Very Long-Chain Acyl-CoA Dehydrogenase
Source: PLoS One. 2015 Mar 26;10(3):e0122297. doi: 10.1371/journal.pone.0122297 (PMC4374878; doi:10.1371/journal.pone.0122297)
Supplement: S1 Dataset — (XLSX) [file pone.0122297.s001.xlsx]

## Sheet: Acetylated peptides
Acession	Protein Name	Description	Modified Sequence	Acetyl Site	BeginPos	EndPos	Precursor M/Z	Product M/Z	z	Retention Time	Mean SIRT3-Tx	StdDev SIRT3-Tx	Mean Ctrl	StdDev Ctrl	Ratio SIRT3-Tx/Ctrl	Peptide Fold Change	P-Value
P49748	ACADV	Very long-chain specific acyl-CoA dehydrogenase	GILLFGTK[+42]AQK	195	188	198	609.366	609.366	2	32.91	278345	48668.5	326396	31191.1	0.852784	-1.17263	0.208281
P49748	ACADV	Very long-chain specific acyl-CoA dehydrogenase	GILLFGTKAQK[+42]EK	198	188	200	492.292	492.292	3	28.46	14441.2	5521.52	8454	1116.8	1.70822	1.70822	0.155909
P49748	ACADV	Very long-chain specific acyl-CoA dehydrogenase	GILLFGTK[+42]AQK[+42]EK	195, 198	188	200	758.94	758.94	2	33.57	102885	21036.2	120270	20546.6	0.855445	-1.16898	0.34533
P49748	ACADV	Very long-chain specific acyl-CoA dehydrogenase	AQK[+42]EKYLPK	198	196	204	382.889	382.889	3	21.56	240935	23467	171642	37032	1.4037	1.4037	0.0402731
P49748	ACADV	Very long-chain specific acyl-CoA dehydrogenase	AQKEK[+42]YLPK	200	196	204	382.889	382.889	3	21.56	244909	24088.9	164614	40568.7	1.48778	1.48778	0.0329185
P49748	ACADV	Very long-chain specific acyl-CoA dehydrogenase	AQK[+42]EK[+42]YLPK	198, 200	196	204	594.835	594.835	2	26.02	79425.8	11505.8	105584	11671.7	0.752255	-1.32934	0.0326713
P49748	ACADV	Very long-chain specific acyl-CoA dehydrogenase	YLPK[+42]LASGETVAAF	204	201	214	754.903	754.903	2	38.84	13009	17478.3	14897.5	18607.3	0.873234	-1.14517	0.90225
P49748	ACADV	Very long-chain specific acyl-CoA dehydrogenase	TSAVPSPC[+57]GK[+42]YYTLNGSK	239	230	247	657.988	658.322	3	29.97	257669	50024.8	229363	34704.1	1.12341	1.12341	0.454985
P49748	ACADV	Very long-chain specific acyl-CoA dehydrogenase	AK[+42]TPVTDPATGAVK	264	263	276	699.385	699.385	2	24.23	17770.2	24162	23666.8	31539.8	0.750853	-1.33182	0.806289
P49748	ACADV	Very long-chain specific acyl-CoA dehydrogenase	AK[+42]TPVTDPATGAVKEK	264	263	278	552.305	552.305	3	22.64	15643.5	12601.7	26719	31340.3	0.585482	-1.70799	0.600854
P49748	ACADV	Very long-chain specific acyl-CoA dehydrogenase	AK[+42]TPVTDPATGAVK[+42]EK	264, 276	263	278	566.309	566.309	3	25.61	17137.8	21447.9	29764.8	43095	0.575773	-1.73679	0.671105
P49748	ACADV	Very long-chain specific acyl-CoA dehydrogenase	TPVTDPATGAVK[+42]EK	276	265	278	728.388	728.388	2	24.23	1.29885e+06	167108	1400051	150654	0.927716	-1.07792	0.465849
P49748	ACADV	Very long-chain specific acyl-CoA dehydrogenase	TPVTDPATGAVK[+42]EKITAF	276	265	282	630.007	630.341	3	34.34	5794.75	6214.82	7636.5	10200.2	0.758823	-1.31783	0.800167
P49748	ACADV	Very long-chain specific acyl-CoA dehydrogenase	TPVTDPATGAVKEK[+42]ITAF	278	265	282	630.007	630.341	3	34.74	14974.8	7799.73	12211.8	6063.57	1.22626	1.22626	0.64628
P49748	ACADV	Very long-chain specific acyl-CoA dehydrogenase	TPVTDPATGAVK[+42]EK[+42]ITAF	276, 278	265	282	644.01	644.345	3	39.92	22168.2	31466.2	17669.5	15743	1.25461	1.25461	0.834608
P49748	ACADV	Very long-chain specific acyl-CoA dehydrogenase	TPVTDPATGAVK[+42]EKITAFVVER	276	265	286	791.1	791.435	3	36.74	494202	231559	558740	48517.1	0.884495	-1.13059	0.666411
P49748	ACADV	Very long-chain specific acyl-CoA dehydrogenase	TPVTDPATGAVKEK[+42]ITAFVVER	278	265	286	791.1	791.435	3	36.76	500388	237712	586257	88653.4	0.853531	-1.1716	0.590616
P49748	ACADV	Very long-chain specific acyl-CoA dehydrogenase	TPVTDPATGAVKEK[+42]ITAFVVER	278	265	286	593.577	593.828	4	36.74	254099	120633	293072	16314.7	0.86702	-1.15338	0.616618
P49748	ACADV	Very long-chain specific acyl-CoA dehydrogenase	TPVTDPATGAVK[+42]EK[+42]ITAFVVER	276, 278	265	286	805.104	805.438	3	41.9	177198	104165	139488	73682.6	1.27035	1.27035	0.628955
P49748	ACADV	Very long-chain specific acyl-CoA dehydrogenase	EK[+42]ITAFVVER	278	277	286	617.346	617.346	2	31.61	721999	68209.5	703708	83277.1	1.02599	1.02599	0.778809
P49748	ACADV	Very long-chain specific acyl-CoA dehydrogenase	GFGGITHGPPEK[+42]K	298	287	299	683.859	683.859	2	23.97	54105.5	27571.5	104169	21553.9	0.519401	-1.92529	0.0502729
P49748	ACADV	Very long-chain specific acyl-CoA dehydrogenase	GFGGITHGPPEK[+42]K	298	287	299	456.242	456.242	3	23.97	365877	165815	543979	55938	0.672595	-1.48678	0.159044
P49748	ACADV	Very long-chain specific acyl-CoA dehydrogenase	GFGGITHGPPEK[+42]K[+42]MGIK	298, 299	287	303	613.326	613.66	3	28.96	1475.5	193.523	39691.5	13811.9	0.0371742	-26.9004	0.0172715
P49748	ACADV	Very long-chain specific acyl-CoA dehydrogenase	GGITHGPPEK[+42]K	298	289	299	581.814	581.814	2	23.97	144647	11070.6	205460	43766.8	0.704018	-1.42042	0.0919624
P49748	ACADV	Very long-chain specific acyl-CoA dehydrogenase	K[+42]VAMHILNNGR	331	331	341	432.24	432.24	3	24.75	12828.5	6629.94	11022.2	5341.18	1.16387	1.16387	0.726438
P49748	ACADV	Very long-chain specific acyl-CoA dehydrogenase	GIIAK[+42]AVDHATNR	358	354	366	469.928	469.928	3	28.02	298039	37017	357832	44179.3	0.832901	-1.20062	0.123998
P49748	ACADV	Very long-chain specific acyl-CoA dehydrogenase	AVDHATNRTQFGEK[+42]IHNFGLIQEK	372	359	382	699.611	699.862	4	29.82	27678.5	5186.5	26270.5	3719.08	1.0536	1.0536	0.71685
P49748	ACADV	Very long-chain specific acyl-CoA dehydrogenase	AVDHATNRTQFGEK[+42]IHNFGLIQEK	372	359	382	559.89	560.091	5	29.82	22265.5	4021.22	21073.2	3707.82	1.05658	1.05658	0.718851
P49748	ACADV	Very long-chain specific acyl-CoA dehydrogenase	TQFGEK[+42]IHNF	372	367	376	631.812	631.812	2	31.27	3301	4602.67	5257.25	7027.11	0.627895	-1.59262	0.702816
P49748	ACADV	Very long-chain specific acyl-CoA dehydrogenase	TQFGEK[+42]IHNFGLIQEK	372	367	382	966.005	966.506	2	33.1	63591	19578.4	74577.8	13358	0.852681	-1.17277	0.456545
P49748	ACADV	Very long-chain specific acyl-CoA dehydrogenase	TQFGEK[+42]IHNFGLIQEK	372	367	382	644.339	644.673	3	33.15	218854	26960	239162	10178.9	0.915088	-1.09279	0.291885
P49748	ACADV	Very long-chain specific acyl-CoA dehydrogenase	IHNFGLIQEK[+42]LAR	382	373	385	527.635	527.635	3	31.8	7675.5	884.828	7804.75	1386.45	0.98344	-1.01684	0.896947
P49748	ACADV	Very long-chain specific acyl-CoA dehydrogenase	GGMGFMK[+42]EPGVER	444	438	450	718.837	718.837	2	30.35	38563.2	58714.6	65759.8	111503	0.586426	-1.70524	0.725346
P49748	ACADV	Very long-chain specific acyl-CoA dehydrogenase	GGMGFMK[+42]EPGVER	444	438	450	479.56	479.56	3	30.35	24244.8	33712.3	29517	48576.1	0.821383	-1.21746	0.882926
P49748	ACADV	Very long-chain specific acyl-CoA dehydrogenase	GGM[+16]GFMK[+42]EPGVER	444	438	450	726.834	726.834	2	27.54	3240	5063.22	4391	7023.56	0.737873	-1.35525	0.826285
P49748	ACADV	Very long-chain specific acyl-CoA dehydrogenase	MK[+42]EPGVER	444	443	450	494.25	494.25	2	21.44	23714.8	11076.3	27523.8	5443.8	0.86161	-1.16062	0.61901
P49748	ACADV	Very long-chain specific acyl-CoA dehydrogenase	GK[+42]ELSGLGSALK	482	481	492	601.343	601.343	2	29.75	193305	76274.3	103422	17574.7	1.86909	1.86909	0.132004
P49748	ACADV	Very long-chain specific acyl-CoA dehydrogenase	GK[+42]ELSGLGSALK	482	481	492	401.231	401.231	3	29.71	28635	12122.3	14504.8	3586.44	1.97418	1.97418	0.134559
P49748	ACADV	Very long-chain specific acyl-CoA dehydrogenase	GK[+42]ELSGLGSALKNPFGNAGLLLGEAGK	482	481	507	880.817	881.151	3	38.94	33352.2	35775.7	14000.2	10968.8	2.38226	2.38226	0.426819
P49748	ACADV	Very long-chain specific acyl-CoA dehydrogenase	NPFGNAGLLLGEAGK[+42]QLR	507	493	510	949.018	949.52	2	38.44	183.5	55.6619	41156.5	9037.06	0.00445859	-224.286	0.00430025
P49748	ACADV	Very long-chain specific acyl-CoA dehydrogenase	NPFGNAGLLLGEAGK[+42]QLR	507	493	510	633.015	633.349	3	38.46	1244	1109.15	193362	31454.7	0.00643352	-155.436	0.001788
P49748	ACADV	Very long-chain specific acyl-CoA dehydrogenase	NPFGNAGLLLGEAGK[+42]QLRR	507	493	511	685.048	685.383	3	36.31	2964	477.906	43320.8	4713.05	0.0684199	-14.6156	0.000604747
P49748	ACADV	Very long-chain specific acyl-CoA dehydrogenase	ALEQFATVVEAK[+42]LIK	550	539	553	567.998	567.998	3	41.14	93950.5	67301.7	105244	35371	0.892692	-1.12021	0.808213
P49748	ACADV	Very long-chain specific acyl-CoA dehydrogenase	ALEQFATVVEAKLIK[+42]HK	553	539	555	492.539	492.789	4	35.05	14449.2	1749.23	13180.5	2275.82	1.09626	1.09626	0.474793
P49748	ACADV	Very long-chain specific acyl-CoA dehydrogenase	ALEQFATVVEAK[+42]LIK[+42]HK	550, 553	539	555	670.386	670.72	3	39.41	101928	67941.5	142906	28983.1	0.713252	-1.40203	0.390313
P49748	ACADV	Very long-chain specific acyl-CoA dehydrogenase	ALEQFATVVEAK[+42]LIK[+42]HK	550, 553	539	555	503.041	503.292	4	39.41	15178.8	10339.6	21424.8	6214.73	0.708468	-1.4115	0.411585
P49748	ACADV	Very long-chain specific acyl-CoA dehydrogenase	ALEQFATVVEAK[+42]LIK[+42]HKK	550, 553	539	556	713.084	713.418	3	36.67	26964	8327.75	32081	3713.72	0.840497	-1.18977	0.384264
P49748	ACADV	Very long-chain specific acyl-CoA dehydrogenase	ALEQFATVVEAK[+42]LIK[+42]HKK	550, 553	539	556	535.065	535.316	4	36.67	69468.8	17165.5	71126.8	3761.35	0.97669	-1.02387	0.879726
P49748	ACADV	Very long-chain specific acyl-CoA dehydrogenase	LIK[+42]HK[+42]KGIVNEQFLLQR	553, 555	551	567	537.822	538.072	4	29.03	117319	19784.7	98674.8	38699.3	1.18895	1.18895	0.494669
P49748	ACADV	Very long-chain specific acyl-CoA dehydrogenase	LIK[+42]HKK[+42]GIVNEQFLLQR	553, 556	551	567	716.76	717.094	3	29.03	46351.2	8572.23	41624.8	14625.2	1.11355	1.11355	0.650188
P49748	ACADV	Very long-chain specific acyl-CoA dehydrogenase	LIK[+42]HKK[+42]GIVNEQFLLQR	553, 556	551	567	537.822	538.072	4	29.03	117199	19756.4	98046.5	39670.6	1.19534	1.19534	0.492161
P49748	ACADV	Very long-chain specific acyl-CoA dehydrogenase	LIKHK[+42]K[+42]GIVNEQFLLQR	555, 556	551	567	716.76	717.094	3	29.52	12453.5	2875.02	12362.8	3248.46	1.00734	1.00734	0.972288
P49748	ACADV	Very long-chain specific acyl-CoA dehydrogenase	LIKHK[+42]K[+42]GIVNEQFLLQR	555, 556	551	567	537.822	538.072	4	29.52	18425.2	4412.39	12846	2382.4	1.43432	1.43432	0.116744
P49748	ACADV	Very long-chain specific acyl-CoA dehydrogenase	LIK[+42]HK[+42]K[+42]GIVNEQFLLQR	553, 555, 556	551	567	1095.64	1096.14	2	32.64	15572	7083.34	20619.8	3921.56	0.755198	-1.32416	0.332676
P49748	ACADV	Very long-chain specific acyl-CoA dehydrogenase	LIK[+42]HK[+42]K[+42]GIVNEQFLLQR	553, 555, 556	551	567	730.763	731.098	3	32.64	261994	66278	299762	22655.1	0.874007	-1.14416	0.4073
P49748	ACADV	Very long-chain specific acyl-CoA dehydrogenase	LIK[+42]HK[+42]K[+42]GIVNEQFLLQR	553, 555, 556	551	567	548.324	548.575	4	32.61	53928.8	16930.2	68909.8	11445.5	0.7826	-1.27779	0.257381
P49748	ACADV	Very long-chain specific acyl-CoA dehydrogenase	HK[+42]KGIVNEQFLLQR	555	554	567	584.669	584.669	3	27.59	25969.5	4683.37	24094.2	2755.66	1.07783	1.07783	0.576803
P49748	ACADV	Very long-chain specific acyl-CoA dehydrogenase	HKK[+42]GIVNEQFLLQR	556	554	567	584.669	584.669	3	27.59	27646.5	4892.84	23896	3462.93	1.15695	1.15695	0.324473
P49748	ACADV	Very long-chain specific acyl-CoA dehydrogenase	HK[+42]K[+42]GIVNEQFLLQR	555, 556	554	567	598.672	599.006	3	30.82	197908	40393.1	202458	29724.6	0.977525	-1.02299	0.880723
P49748	ACADV	Very long-chain specific acyl-CoA dehydrogenase	K[+42]GIVNEQFLLQR	556	556	567	743.922	743.922	2	33.49	975692	214004	1.0056e+06	232509	0.970256	-1.03066	0.875196
P49748	ACADV	Very long-chain specific acyl-CoA dehydrogenase	K[+42]GIVNEQFLLQR	556	556	567	496.284	496.284	3	33.49	34678.8	9532.18	33330	9340.97	1.04047	1.04047	0.866807
P49748	ACADV	Very long-chain specific acyl-CoA dehydrogenase	NFKSISK[+42]ALVER	639	633	644	478.609	478.609	3	29.15	19873.8	3720.23	16669.2	4535.83	1.19224	1.19224	0.38194
P49748	ACADV	Very long-chain specific acyl-CoA dehydrogenase	NFK[+42]SISK[+42]ALVER	635, 639	633	644	738.414	738.414	2	34.87	389244	26547.6	441849	64056.9	0.880945	-1.13514	0.259118
P49748	ACADV	Very long-chain specific acyl-CoA dehydrogenase	NFK[+42]SISK[+42]ALVER	635, 639	633	644	492.612	492.612	3	34.9	58584.8	21288.3	54111.5	16942.8	1.08267	1.08267	0.785861
P49748	ACADV	Very long-chain specific acyl-CoA dehydrogenase	SISK[+42]ALVER	639	636	644	522.806	522.806	2	26.51	315402	69166.8	328645	76269	0.959706	-1.04199	0.831172
P49748	ACADV	Very long-chain specific acyl-CoA dehydrogenase	SISK[+42]ALVERGGVVTSNPLGF	639	636	655	691.716	692.05	3	37.08	12942.5	8194.01	9611.5	5383.76	1.34656	1.34656	0.580935

## Sheet: Unmodified peptides
Accession	Protein Name	Protein Description	Modified Sequence	BeginPos	EndPos	Precursor M/Z	Product M/Z	Z	Retention Time	Mean SIRT3-Tx	StdDev SIRT3-Tx	Mean Ctrl	StdDev Ctrl	Ratio SIRT3-Tx/Ctrl	Peptide Fold Change	P-Value
P49748	ACADV	Very long-chain specific acyl-CoA dehydrogenase, mitochondrial OS=Homo sapiens GN=ACADVL PE=1 SV=1	SFAVGMFK	72	79	443.728	443.728	2	31.3	780748	85547.4	790109	83341	0.988153	-1.01199	0.896462
P49748	ACADV	Very long-chain specific acyl-CoA dehydrogenase, mitochondrial OS=Homo sapiens GN=ACADVL PE=1 SV=1	GQLTTDQVFPYPSVLNEEQTQFLK	80	103	928.136	928.47	3	39.24	160172	99973.8	113692	61210	1.40883	1.40883	0.522935
P49748	ACADV	Very long-chain specific acyl-CoA dehydrogenase, mitochondrial OS=Homo sapiens GN=ACADVL PE=1 SV=1	GQLTTDQVFPYPSVLNEEQTQFLK	80	103	696.354	696.605	4	39.27	11236.2	7523.8	6625.25	4183.27	1.69597	1.69597	0.398749
P49748	ACADV	Very long-chain specific acyl-CoA dehydrogenase, mitochondrial OS=Homo sapiens GN=ACADVL PE=1 SV=1	LKELVEPVSR	102	111	390.568	390.568	3	23.39	10209.8	5141.26	8413.25	2431.1	1.21353	1.21353	0.611582
P49748	ACADV	Very long-chain specific acyl-CoA dehydrogenase, mitochondrial OS=Homo sapiens GN=ACADVL PE=1 SV=1	ELVEPVSR	104	111	464.759	464.759	2	22.75	1.58922e+06	147580	1.71973e+06	177090	0.924107	-1.08213	0.365812
P49748	ACADV	Very long-chain specific acyl-CoA dehydrogenase, mitochondrial OS=Homo sapiens GN=ACADVL PE=1 SV=1	FFEEVNDPAK	112	121	598.285	598.285	2	27.59	109435	25793.7	135510	29066.5	0.807582	-1.23826	0.2899
P49748	ACADV	Very long-chain specific acyl-CoA dehydrogenase, mitochondrial OS=Homo sapiens GN=ACADVL PE=1 SV=1	FFEEVNDPAKNDALEMVEETTWQGLK	112	137	1014.15	1014.48	3	39.9	18715.5	18937.2	3106.75	1403.74	6.02414	6.02414	0.248778
P49748	ACADV	Very long-chain specific acyl-CoA dehydrogenase, mitochondrial OS=Homo sapiens GN=ACADVL PE=1 SV=1	ELGAFGLQVPSELGGVGLC[+57]NTQYAR	138	162	879.443	879.777	3	39.51	16653.8	9942.6	7176.75	4114.02	2.32051	2.32051	0.201862
P49748	ACADV	Very long-chain specific acyl-CoA dehydrogenase, mitochondrial OS=Homo sapiens GN=ACADVL PE=1 SV=1	GLQVPSELGGVGLC[+57]NTQYAR	143	162	707.025	707.359	3	34.3	41599.2	64294.6	49354.5	76284.1	0.842866	-1.18643	0.897421
P49748	ACADV	Very long-chain specific acyl-CoA dehydrogenase, mitochondrial OS=Homo sapiens GN=ACADVL PE=1 SV=1	GILLFGTK	188	195	424.766	424.766	2	32.69	960243	148279	1.02198e+06	36054	0.939586	-1.0643	0.528972
P49748	ACADV	Very long-chain specific acyl-CoA dehydrogenase, mitochondrial OS=Homo sapiens GN=ACADVL PE=1 SV=1	GILLFGTKAQKEK	188	200	358.969	358.969	4	24.64	11652	2825.79	12059.8	2410.15	0.966189	-1.03499	0.855608
P49748	ACADV	Very long-chain specific acyl-CoA dehydrogenase, mitochondrial OS=Homo sapiens GN=ACADVL PE=1 SV=1	YLPKLASGETVAAF	201	214	733.898	733.898	2	33.68	7487	8240.46	11472.5	15705.9	0.652604	-1.53232	0.71472
P49748	ACADV	Very long-chain specific acyl-CoA dehydrogenase, mitochondrial OS=Homo sapiens GN=ACADVL PE=1 SV=1	LASGETVAAF	205	214	483.251	483.251	2	31.51	89566.5	51354.7	88802.5	95828.7	1.0086	1.0086	0.9908
P49748	ACADV	Very long-chain specific acyl-CoA dehydrogenase, mitochondrial OS=Homo sapiens GN=ACADVL PE=1 SV=1	LASGETVAAFC[+57]LTEPSSGSDAASIR	205	229	833.067	833.402	3	33.89	124267	62774	135081	23564.3	0.919942	-1.08702	0.79441
P49748	ACADV	Very long-chain specific acyl-CoA dehydrogenase, mitochondrial OS=Homo sapiens GN=ACADVL PE=1 SV=1	C[+57]LTEPSSGSDAASIR	215	229	775.859	775.859	2	24.83	193776	221823	270666	387664	0.715924	-1.3968	0.778108
P49748	ACADV	Very long-chain specific acyl-CoA dehydrogenase, mitochondrial OS=Homo sapiens GN=ACADVL PE=1 SV=1	TSAVPSPC[+57]GK	230	239	502.247	502.247	2	11.37	2248479	897053	2413088	1.23697e+06	0.931785	-1.07321	0.858705
P49748	ACADV	Very long-chain specific acyl-CoA dehydrogenase, mitochondrial OS=Homo sapiens GN=ACADVL PE=1 SV=1	TSAVPSPC[+57]GKYYTLNGSK	230	247	643.984	644.318	3	26.51	32732	7307.44	25335	9079.49	1.29197	1.29197	0.315616
P49748	ACADV	Very long-chain specific acyl-CoA dehydrogenase, mitochondrial OS=Homo sapiens GN=ACADVL PE=1 SV=1	YYTLNGSK	240	247	473.237	473.237	2	22.93	652254	52735.7	595587	39609.2	1.09515	1.09515	0.191021
P49748	ACADV	Very long-chain specific acyl-CoA dehydrogenase, mitochondrial OS=Homo sapiens GN=ACADVL PE=1 SV=1	LWISNGGLADIF	248	259	653.346	653.346	2	44.86	6705.5	8348.47	4302.5	4654.53	1.55851	1.55851	0.682503
P49748	ACADV	Very long-chain specific acyl-CoA dehydrogenase, mitochondrial OS=Homo sapiens GN=ACADVL PE=1 SV=1	LWISNGGLADIFTVFAK	248	264	926.504	927.005	2	45.46	23107	15838.6	12685.2	10394.2	1.82156	1.82156	0.382995
P49748	ACADV	Very long-chain specific acyl-CoA dehydrogenase, mitochondrial OS=Homo sapiens GN=ACADVL PE=1 SV=1	LWISNGGLADIFTVFAK	248	264	618.005	618.339	3	45.41	16927.2	11466	10160.5	7832.17	1.66599	1.66599	0.435074
P49748	ACADV	Very long-chain specific acyl-CoA dehydrogenase, mitochondrial OS=Homo sapiens GN=ACADVL PE=1 SV=1	TPVTDPATGAVK	265	276	578.814	578.814	2	22.16	1.39904e+06	119442	1571685	118435	0.890153	-1.1234	0.12577
P49748	ACADV	Very long-chain specific acyl-CoA dehydrogenase, mitochondrial OS=Homo sapiens GN=ACADVL PE=1 SV=1	TPVTDPATGAVKEK	265	278	471.924	471.924	3	20.47	704522	56429.4	659528	36999.7	1.06822	1.06822	0.298626
P49748	ACADV	Very long-chain specific acyl-CoA dehydrogenase, mitochondrial OS=Homo sapiens GN=ACADVL PE=1 SV=1	TPVTDPATGAVKEKITAFVVER	265	286	583.075	583.325	4	32.16	23974.2	5161.75	21154.8	4011.59	1.13328	1.13328	0.484936
P49748	ACADV	Very long-chain specific acyl-CoA dehydrogenase, mitochondrial OS=Homo sapiens GN=ACADVL PE=1 SV=1	EKITAFVVER	277	286	596.34	596.34	2	26.61	9426.75	1946.01	8653	1009.98	1.08942	1.08942	0.570531
P49748	ACADV	Very long-chain specific acyl-CoA dehydrogenase, mitochondrial OS=Homo sapiens GN=ACADVL PE=1 SV=1	EKITAFVVER	277	286	397.896	397.896	3	26.61	2863.25	825.364	1988	170.04	1.44027	1.44027	0.162631
P49748	ACADV	Very long-chain specific acyl-CoA dehydrogenase, mitochondrial OS=Homo sapiens GN=ACADVL PE=1 SV=1	ITAFVVER	279	286	467.771	467.771	2	27.59	1.27526e+06	128962	1.23571e+06	113112	1.03201	1.03201	0.703697
P49748	ACADV	Very long-chain specific acyl-CoA dehydrogenase, mitochondrial OS=Homo sapiens GN=ACADVL PE=1 SV=1	VVERGFGGITHGPPEKK	283	299	452.751	453.002	4	20.98	9292	11682.6	18240.8	28256	0.509409	-1.96306	0.638898
P49748	ACADV	Very long-chain specific acyl-CoA dehydrogenase, mitochondrial OS=Homo sapiens GN=ACADVL PE=1 SV=1	GFGGITHGPPEK	287	298	598.807	598.807	2	22.37	277536	28644.2	312450	41913	0.888257	-1.1258	0.284166
P49748	ACADV	Very long-chain specific acyl-CoA dehydrogenase, mitochondrial OS=Homo sapiens GN=ACADVL PE=1 SV=1	GFGGITHGPPEK	287	298	399.54	399.54	3	22.53	605528	15515.7	600027	30517	1.00917	1.00917	0.793241
P49748	ACADV	Very long-chain specific acyl-CoA dehydrogenase, mitochondrial OS=Homo sapiens GN=ACADVL PE=1 SV=1	GFGGITHGPPEKK	287	299	442.238	442.238	3	16.94	4.39994e+06	205499	3.49431e+06	1.98167e+06	1.25917	1.25917	0.487455
P49748	ACADV	Very long-chain specific acyl-CoA dehydrogenase, mitochondrial OS=Homo sapiens GN=ACADVL PE=1 SV=1	GFGGITHGPPEKK	287	299	331.931	331.931	4	16.94	3161001	121601	2.51076e+06	1.42635e+06	1.25898	1.25898	0.488102
P49748	ACADV	Very long-chain specific acyl-CoA dehydrogenase, mitochondrial OS=Homo sapiens GN=ACADVL PE=1 SV=1	GFGGITHGPPEKKMGIK	287	303	439.241	439.241	4	22.61	13278.5	990.058	10209.5	1944.07	1.3006	1.3006	0.064984
P49748	ACADV	Very long-chain specific acyl-CoA dehydrogenase, mitochondrial OS=Homo sapiens GN=ACADVL PE=1 SV=1	GGITHGPPEK	289	298	496.762	496.762	2	22.38	394964	24895.6	420405	34453.2	0.939484	-1.06441	0.343588
P49748	ACADV	Very long-chain specific acyl-CoA dehydrogenase, mitochondrial OS=Homo sapiens GN=ACADVL PE=1 SV=1	ASNTAEVFFDGVR	304	316	706.844	706.844	2	32.76	1.11206e+06	234516	1.2123e+06	53591.9	0.917312	-1.09014	0.518066
P49748	ACADV	Very long-chain specific acyl-CoA dehydrogenase, mitochondrial OS=Homo sapiens GN=ACADVL PE=1 SV=1	ASNTAEVFFDGVRVPSENVLGEVGSGFK	304	331	971.486	971.82	3	38.64	18926	12740.2	7330.75	4133.48	2.58173	2.58173	0.215273
P49748	ACADV	Very long-chain specific acyl-CoA dehydrogenase, mitochondrial OS=Homo sapiens GN=ACADVL PE=1 SV=1	VPSENVLGEVGSGFK	317	331	759.894	759.894	2	32.88	513721	123927	486542	53505.1	1.05586	1.05586	0.744528
P49748	ACADV	Very long-chain specific acyl-CoA dehydrogenase, mitochondrial OS=Homo sapiens GN=ACADVL PE=1 SV=1	VAMHILNNGR	332	341	375.538	375.538	3	22.61	274328	31876.9	238542	40158.8	1.15002	1.15002	0.274395
P49748	ACADV	Very long-chain specific acyl-CoA dehydrogenase, mitochondrial OS=Homo sapiens GN=ACADVL PE=1 SV=1	FGMAAALAGTMR	342	353	598.799	598.799	2	32.91	842577	185670	944822	77411.8	0.891784	-1.12135	0.428241
P49748	ACADV	Very long-chain specific acyl-CoA dehydrogenase, mitochondrial OS=Homo sapiens GN=ACADVL PE=1 SV=1	AVDHATNRTQFGEKIHNFGLIQEK	359	382	689.108	689.359	4	26.44	31194	6436.46	30632.8	6247	1.01832	1.01832	0.917232
P49748	ACADV	Very long-chain specific acyl-CoA dehydrogenase, mitochondrial OS=Homo sapiens GN=ACADVL PE=1 SV=1	AVDHATNRTQFGEKIHNFGLIQEK	359	382	551.488	551.689	5	26.44	73436	14643	68432.8	11967.9	1.07311	1.07311	0.663532
P49748	ACADV	Very long-chain specific acyl-CoA dehydrogenase, mitochondrial OS=Homo sapiens GN=ACADVL PE=1 SV=1	AVDHATNRTQFGEKIHNFGLIQEKLAR	359	385	619.533	619.733	5	27.55	17865.2	3371.86	17886.8	2504.37	0.998798	0.998798	0.993237
P49748	ACADV	Very long-chain specific acyl-CoA dehydrogenase, mitochondrial OS=Homo sapiens GN=ACADVL PE=1 SV=1	TQFGEKIHNFGLIQEK	367	382	630.335	630.67	3	28.55	214060	37616.7	180931	33651	1.18311	1.18311	0.299438
P49748	ACADV	Very long-chain specific acyl-CoA dehydrogenase, mitochondrial OS=Homo sapiens GN=ACADVL PE=1 SV=1	TQFGEKIHNFGLIQEK	367	382	473.003	473.254	4	28.56	213550	36604.2	177642	22845.6	1.20214	1.20214	0.208697
P49748	ACADV	Very long-chain specific acyl-CoA dehydrogenase, mitochondrial OS=Homo sapiens GN=ACADVL PE=1 SV=1	TQFGEKIHNFGLIQEKLAR	367	385	558.059	558.31	4	29.34	25091.2	3790.18	25644.5	5680.79	0.978426	-1.02205	0.893654
P49748	ACADV	Very long-chain specific acyl-CoA dehydrogenase, mitochondrial OS=Homo sapiens GN=ACADVL PE=1 SV=1	IHNFGLIQEK	373	382	599.833	599.833	2	26.17	765033	118373	872424	61454.4	0.876905	-1.14037	0.227947
P49748	ACADV	Very long-chain specific acyl-CoA dehydrogenase, mitochondrial OS=Homo sapiens GN=ACADVL PE=1 SV=1	IHNFGLIQEKLAR	373	385	513.632	513.632	3	27.12	34224	7862	36507.5	8348.2	0.937451	-1.06672	0.741979
P49748	ACADV	Very long-chain specific acyl-CoA dehydrogenase, mitochondrial OS=Homo sapiens GN=ACADVL PE=1 SV=1	IHNFGLIQEKLAR	373	385	385.476	385.476	4	27.13	39505.8	9487.86	41579	10590.3	0.950137	-1.05248	0.809142
P49748	ACADV	Very long-chain specific acyl-CoA dehydrogenase, mitochondrial OS=Homo sapiens GN=ACADVL PE=1 SV=1	MVMLQY	386	391	392.69	392.69	2	34.34	19472.2	13977.1	18489.5	13033.4	1.05315	1.05315	0.93194
P49748	ACADV	Very long-chain specific acyl-CoA dehydrogenase, mitochondrial OS=Homo sapiens GN=ACADVL PE=1 SV=1	MVMLQYVTESM	386	396	666.306	666.306	2	41.2	3737.75	5695.53	3317.5	4981.32	1.12668	1.12668	0.926549
P49748	ACADV	Very long-chain specific acyl-CoA dehydrogenase, mitochondrial OS=Homo sapiens GN=ACADVL PE=1 SV=1	IFGSEAAWK	420	428	504.761	504.761	2	29.34	411863	134006	518115	97209.7	0.794926	-1.25798	0.312727
P49748	ACADV	Very long-chain specific acyl-CoA dehydrogenase, mitochondrial OS=Homo sapiens GN=ACADVL PE=1 SV=1	VTDEC[+57]IQIM	429	437	554.754	554.754	2	33.12	19086.2	27621.6	21345.2	35633.9	0.894168	-1.11836	0.933837
P49748	ACADV	Very long-chain specific acyl-CoA dehydrogenase, mitochondrial OS=Homo sapiens GN=ACADVL PE=1 SV=1	VTDEC[+57]IQIMGGMGFMKEPGVER	429	450	828.718	829.052	3	35.17	46513.8	23923.3	56622.2	13925.7	0.821475	-1.21732	0.555819
P49748	ACADV	Very long-chain specific acyl-CoA dehydrogenase, mitochondrial OS=Homo sapiens GN=ACADVL PE=1 SV=1	GGMGFMKEPGVER	438	450	465.557	465.557	3	26.4	166455	208956	142628	225751	1.16705	1.16705	0.89769
P49748	ACADV	Very long-chain specific acyl-CoA dehydrogenase, mitochondrial OS=Homo sapiens GN=ACADVL PE=1 SV=1	VLRDLRIFR	451	459	396.584	396.584	3	27.09	60064.8	9836.59	61151.2	15727.3	0.982233	-1.01809	0.923111
P49748	ACADV	Very long-chain specific acyl-CoA dehydrogenase, mitochondrial OS=Homo sapiens GN=ACADVL PE=1 SV=1	IFRIFEGTNDILR	457	469	531.963	531.963	3	34.46	110644	18284.6	107796	21591.3	1.02642	1.02642	0.867488
P49748	ACADV	Very long-chain specific acyl-CoA dehydrogenase, mitochondrial OS=Homo sapiens GN=ACADVL PE=1 SV=1	IFEGTNDILR	460	469	589.314	589.314	2	30.39	1674370	545392	2.19184e+06	258643	0.763909	-1.30906	0.207134
P49748	ACADV	Very long-chain specific acyl-CoA dehydrogenase, mitochondrial OS=Homo sapiens GN=ACADVL PE=1 SV=1	LFVALQGC[+57]MDK	470	480	641.32	641.32	2	31.47	117454	22605.6	110476	21718.3	1.06316	1.06316	0.713149
P49748	ACADV	Very long-chain specific acyl-CoA dehydrogenase, mitochondrial OS=Homo sapiens GN=ACADVL PE=1 SV=1	LFVALQGC[+57]MDKGK	470	482	489.588	489.588	3	28.33	237538	58153.6	244213	35228.7	0.972666	-1.0281	0.871716
P49748	ACADV	Very long-chain specific acyl-CoA dehydrogenase, mitochondrial OS=Homo sapiens GN=ACADVL PE=1 SV=1	LFVALQGC[+57]MDKGKELSGLGSALK	470	492	606.326	606.577	4	33.64	7807.25	4621.71	5049.5	496.553	1.54614	1.54614	0.378204
P49748	ACADV	Very long-chain specific acyl-CoA dehydrogenase, mitochondrial OS=Homo sapiens GN=ACADVL PE=1 SV=1	GKELSGLGSALK	481	492	387.228	387.228	3	24.79	101052	31184.3	43782.8	6700.92	2.30803	2.30803	0.0469833
P49748	ACADV	Very long-chain specific acyl-CoA dehydrogenase, mitochondrial OS=Homo sapiens GN=ACADVL PE=1 SV=1	GKELSGLGSALKNPFGNAGLLLGEAGK	481	507	866.813	867.147	3	36.23	26347.2	24215.7	7962.75	2022.17	3.30881	3.30881	0.280222
P49748	ACADV	Very long-chain specific acyl-CoA dehydrogenase, mitochondrial OS=Homo sapiens GN=ACADVL PE=1 SV=1	GKELSGLGSALKNPFGNAGLLLGEAGK	481	507	650.362	650.612	4	36.16	23391.5	25653	6179.75	1489.58	3.78519	3.78519	0.329418
P49748	ACADV	Very long-chain specific acyl-CoA dehydrogenase, mitochondrial OS=Homo sapiens GN=ACADVL PE=1 SV=1	ELSGLGSALK	483	492	487.779	487.779	2	27.83	228505	55049.7	129622	16371	1.76285	1.76285	0.0476831
P49748	ACADV	Very long-chain specific acyl-CoA dehydrogenase, mitochondrial OS=Homo sapiens GN=ACADVL PE=1 SV=1	ELSGLGSALKNPFGNAGLLLGEAGK	483	507	805.108	805.442	3	38.64	86625.8	76044.3	25837.8	14006.3	3.35268	3.35268	0.261171
P49748	ACADV	Very long-chain specific acyl-CoA dehydrogenase, mitochondrial OS=Homo sapiens GN=ACADVL PE=1 SV=1	NPFGNAGLLLGEAGK	493	507	729.391	729.391	2	35.3	1.4829e+06	238061	532451	73769.2	2.78505	2.78505	0.00402325
P49748	ACADV	Very long-chain specific acyl-CoA dehydrogenase, mitochondrial OS=Homo sapiens GN=ACADVL PE=1 SV=1	NPFGNAGLLLGEAGKQLR	493	510	619.011	619.345	3	35.27	17248.2	8869.85	7599	2393.91	2.26981	2.26981	0.154702
P49748	ACADV	Very long-chain specific acyl-CoA dehydrogenase, mitochondrial OS=Homo sapiens GN=ACADVL PE=1 SV=1	GNAGLLLGEAGK	496	507	550.309	550.309	2	27.92	31810.8	11622.8	12822.2	2136.12	2.4809	2.4809	0.0638889
P49748	ACADV	Very long-chain specific acyl-CoA dehydrogenase, mitochondrial OS=Homo sapiens GN=ACADVL PE=1 SV=1	RRAGLGSGLSLSGLVHPELSR	511	531	721.41	721.744	3	29.86	38264.2	7318.46	31586.8	8047.89	1.2114	1.2114	0.328932
P49748	ACADV	Very long-chain specific acyl-CoA dehydrogenase, mitochondrial OS=Homo sapiens GN=ACADVL PE=1 SV=1	RRAGLGSGLSLSGLVHPELSR	511	531	541.309	541.56	4	29.83	320382	28843.5	265792	54171	1.20539	1.20539	0.189362
P49748	ACADV	Very long-chain specific acyl-CoA dehydrogenase, mitochondrial OS=Homo sapiens GN=ACADVL PE=1 SV=1	RRAGLGSGLSLSGLVHPELSR	511	531	433.249	433.449	5	29.82	100682	12055.4	76439.2	18300.6	1.31714	1.31714	0.111375
P49748	ACADV	Very long-chain specific acyl-CoA dehydrogenase, mitochondrial OS=Homo sapiens GN=ACADVL PE=1 SV=1	RAGLGSGLSLSGLVHPELSR	512	531	669.376	669.711	3	31.97	296462	41252.8	329022	25780.5	0.901037	-1.10983	0.298343
P49748	ACADV	Very long-chain specific acyl-CoA dehydrogenase, mitochondrial OS=Homo sapiens GN=ACADVL PE=1 SV=1	RAGLGSGLSLSGLVHPELSR	512	531	502.284	502.535	4	31.97	315056	36101	346068	8130.14	0.91039	-1.09843	0.234501
P49748	ACADV	Very long-chain specific acyl-CoA dehydrogenase, mitochondrial OS=Homo sapiens GN=ACADVL PE=1 SV=1	RAGLGSGLSLSGLVHPELSRSGELAVR	512	538	544.506	544.707	5	32.28	16830	5049.19	20500	3840.44	0.820976	-1.21806	0.357637
P49748	ACADV	Very long-chain specific acyl-CoA dehydrogenase, mitochondrial OS=Homo sapiens GN=ACADVL PE=1 SV=1	AGLGSGLSLSGLVHPELSR	513	531	925.51	925.51	2	34.7	442359	112222	479716	92659.3	0.922128	-1.08445	0.672737
P49748	ACADV	Very long-chain specific acyl-CoA dehydrogenase, mitochondrial OS=Homo sapiens GN=ACADVL PE=1 SV=1	AGLGSGLSLSGLVHPELSR	513	531	617.343	617.343	3	34.62	1.29416e+06	166782	1.52928e+06	213753	0.846258	-1.18167	0.18664
P49748	ACADV	Very long-chain specific acyl-CoA dehydrogenase, mitochondrial OS=Homo sapiens GN=ACADVL PE=1 SV=1	AGLGSGLSLSGLVHPELSRSGELAVR	513	538	641.355	641.606	4	34.38	80334.5	43042.7	102875	17343.4	0.780894	-1.28058	0.448101
P49748	ACADV	Very long-chain specific acyl-CoA dehydrogenase, mitochondrial OS=Homo sapiens GN=ACADVL PE=1 SV=1	SGELAVRALEQFATVVEAK	532	550	673.369	673.703	3	40.41	15754.2	9528.39	17602.8	6507.17	0.894988	-1.11733	0.791913
P49748	ACADV	Very long-chain specific acyl-CoA dehydrogenase, mitochondrial OS=Homo sapiens GN=ACADVL PE=1 SV=1	ALEQFATVVEAK	539	550	653.356	653.356	2	31.23	3.42086e+06	407127	3.73023e+06	414556	0.917066	-1.09043	0.392012
P49748	ACADV	Very long-chain specific acyl-CoA dehydrogenase, mitochondrial OS=Homo sapiens GN=ACADVL PE=1 SV=1	KGIVNEQFLLQR	556	567	482.281	482.281	3	29.34	42641	3709.98	40028.8	4779	1.06526	1.06526	0.484484
P49748	ACADV	Very long-chain specific acyl-CoA dehydrogenase, mitochondrial OS=Homo sapiens GN=ACADVL PE=1 SV=1	GIVNEQFLLQR	557	567	658.87	658.87	2	33.01	1.0852e+06	134567	1.08177e+06	116862	1.00317	1.00317	0.974548
P49748	ACADV	Very long-chain specific acyl-CoA dehydrogenase, mitochondrial OS=Homo sapiens GN=ACADVL PE=1 SV=1	LADGAIDLY	568	576	475.745	475.745	2	35.05	63433	95131.9	80696.8	133622	0.786066	-1.27216	0.861974
P49748	ACADV	Very long-chain specific acyl-CoA dehydrogenase, mitochondrial OS=Homo sapiens GN=ACADVL PE=1 SV=1	LADGAIDLYAMVVVLSR	568	584	602.666	602.666	3	45.53	26533.8	15775.8	22336.5	18870	1.18791	1.18791	0.777822
P49748	ACADV	Very long-chain specific acyl-CoA dehydrogenase, mitochondrial OS=Homo sapiens GN=ACADVL PE=1 SV=1	MLC[+57]DTWC[+57]IEAAAR	601	613	798.852	798.852	2	33.26	120272	45155.5	124634	17475	0.964998	-1.03627	0.883772
P49748	ACADV	Very long-chain specific acyl-CoA dehydrogenase, mitochondrial OS=Homo sapiens GN=ACADVL PE=1 SV=1	IREGMAALQSDPWQQELYR	614	632	764.379	764.714	3	33.42	648100	194004	653186	68370.7	0.992213	-1.00785	0.96803
P49748	ACADV	Very long-chain specific acyl-CoA dehydrogenase, mitochondrial OS=Homo sapiens GN=ACADVL PE=1 SV=1	IREGMAALQSDPWQQELYRNFK	614	635	670.838	671.089	4	34.18	39928	30999.6	50358.2	22564.5	0.792879	-1.26123	0.655679
P49748	ACADV	Very long-chain specific acyl-CoA dehydrogenase, mitochondrial OS=Homo sapiens GN=ACADVL PE=1 SV=1	EGMAALQSDPWQQELYR	616	632	1011.47	1011.97	2	35.68	171541	81215.3	220465	45047.8	0.778087	-1.2852	0.406036
P49748	ACADV	Very long-chain specific acyl-CoA dehydrogenase, mitochondrial OS=Homo sapiens GN=ACADVL PE=1 SV=1	EGMAALQSDPWQQELYR	616	632	674.651	674.985	3	35.68	193206	43432.1	221980	21700.1	0.870374	-1.14893	0.35762
P49748	ACADV	Very long-chain specific acyl-CoA dehydrogenase, mitochondrial OS=Homo sapiens GN=ACADVL PE=1 SV=1	SISKALVER	636	644	334.87	334.87	3	19.33	29085.5	2363.27	29661.5	6690.88	0.980581	-1.0198	0.895439
P49748	ACADV	Very long-chain specific acyl-CoA dehydrogenase, mitochondrial OS=Homo sapiens GN=ACADVL PE=1 SV=1	SISKALVERGGVVTSNPLGF	636	655	677.713	678.047	3	33.16	29437.2	1012.71	30762.2	5873.64	0.956928	-1.04501	0.724541
P49748	ACADV	Very long-chain specific acyl-CoA dehydrogenase, mitochondrial OS=Homo sapiens GN=ACADVL PE=1 SV=1	ALVERGGVVTSNPLGF	640	655	808.444	808.444	2	34.34	297267	59630.1	293353	59958.8	1.01334	1.01334	0.938706
P49748	ACADV	Very long-chain specific acyl-CoA dehydrogenase, mitochondrial OS=Homo sapiens GN=ACADVL PE=1 SV=1	GGVVTSNPLGF	645	655	524.277	524.277	2	36.16	1.05645e+06	62548.2	1090761	60954.1	0.968542	-1.03248	0.521591
